# Supplementary material for: Using the United Kingdom standards for public involvement to evaluate the impact of public involvement in a multinational clinical study
Source: PubMed Central journal article supplement (PMC8088001; doi:10.1186/s40900-021-00264-3), 2021-04-30
Supplement: 40900_2021_264_MOESM1_ESM.pdf [file 40900_2021_264_MOESM1_ESM.pdf]

| <b>Standard 1: Inclusive Opportunities</b>                                                                     |                                                                                                                                                                                      |                                                                                                                                                                                                                                          |
|----------------------------------------------------------------------------------------------------------------|--------------------------------------------------------------------------------------------------------------------------------------------------------------------------------------|------------------------------------------------------------------------------------------------------------------------------------------------------------------------------------------------------------------------------------------|
| We offer public opportunities that are accessible and that reach people and groups according to research needs |                                                                                                                                                                                      |                                                                                                                                                                                                                                          |
| Indicator 1.1                                                                                                  | We involve people affected by and interested in research topic/issue at the earliest stage                                                                                           |                                                                                                                                                                                                                                          |
| <u>Prompt</u>                                                                                                  | Are public contributors involved in:                                                                                                                                                 | <input type="checkbox"/> Trial/study design<br><input type="checkbox"/> Research prioritisation processes<br><input type="checkbox"/> Formulating the research question                                                                  |
| Indicator 1.2                                                                                                  | We identify and address barriers to taking up public involvement in research                                                                                                         |                                                                                                                                                                                                                                          |
| <u>Prompt</u>                                                                                                  | Are there particular challenges in involving public contributors effectively e.g. payment, nature of research, ability to travel, use of IT, accessing diverse communities or other. |                                                                                                                                                                                                                                          |
|                                                                                                                | What solutions have been found to these challenges?                                                                                                                                  |                                                                                                                                                                                                                                          |
| Indicator 1.3                                                                                                  | We make information about opportunities for public involvement available, using different methods so that we reach relevant and interested people                                    |                                                                                                                                                                                                                                          |
| <u>Prompt</u>                                                                                                  | From where are public contributors drawn?                                                                                                                                            | <input type="checkbox"/> Local PPI networks e.g. Involving People (Wales)<br><input type="checkbox"/> Existing or active groups<br><input type="checkbox"/> Recruited from specific communities. Please give examples.                   |
|                                                                                                                | How might people find out about involvement opportunities?                                                                                                                           | <input type="checkbox"/> Websites<br><input type="checkbox"/> Direct email<br><input type="checkbox"/> Twitter<br><input type="checkbox"/> Radio<br><input type="checkbox"/> Word of mouth<br><input type="checkbox"/> Other             |
| Indicator 1.4                                                                                                  | We have a fair and transparent recruitment processes for involving the public in research                                                                                            |                                                                                                                                                                                                                                          |
| <u>Prompt</u>                                                                                                  | The recruitment process includes:                                                                                                                                                    | <input type="checkbox"/> Role descriptions<br><input type="checkbox"/> Person specifications<br><input type="checkbox"/> Adverts<br><input type="checkbox"/> Interviews<br><input type="checkbox"/> Recruiter feedback post applications |
| Indicator 1.5                                                                                                  | We offer choice and flexibility in opportunities for public involvement in research                                                                                                  |                                                                                                                                                                                                                                          |

|               |                                                                                                                                    |                                                          |
|---------------|------------------------------------------------------------------------------------------------------------------------------------|----------------------------------------------------------|
| <u>Prompt</u> | Is there a choice of types of opportunities for public involvement, e.g.: meetings, reviewing documents, governance?               | Please list opportunities:                               |
|               | Is there flexibility in undertaking public involvement opportunities e.g.: working remotely, attending meetings via teleconference | Please list:                                             |
|               | Are public contributors free to identify and develop projects of interest?                                                         | <input type="checkbox"/> Yes<br>Can you give an example: |

|                                                                                                                                        |                                                                                                                   |                                                                                                                            |
|----------------------------------------------------------------------------------------------------------------------------------------|-------------------------------------------------------------------------------------------------------------------|----------------------------------------------------------------------------------------------------------------------------|
| <b>Standard 2: Working Together</b>                                                                                                    |                                                                                                                   |                                                                                                                            |
| We work together in a way that values all contributions, and that builds and sustains mutually respectful and productive relationships |                                                                                                                   |                                                                                                                            |
| Indicator 2.1                                                                                                                          | We jointly define and record the purpose of our public involvement activity                                       |                                                                                                                            |
| <u>Prompt</u>                                                                                                                          | Is there a role description to fit the involvement activity?                                                      | <input type="checkbox"/> Yes<br><input type="checkbox"/> No                                                                |
|                                                                                                                                        | Are objectives set per involvement activity?                                                                      | <input type="checkbox"/> Yes<br><input type="checkbox"/> No                                                                |
| Indicator 2.2                                                                                                                          | We develop public involvement plans and activities together                                                       |                                                                                                                            |
| <u>Prompt</u>                                                                                                                          | Do public contributors take part in reviewing, developing and coordinating involvement activities?                | <input type="checkbox"/> Yes<br><input type="checkbox"/> No                                                                |
| Indicator 2.3                                                                                                                          | We ensure there is a shared understanding of roles, responsibilities and expectations, which may evolve over time |                                                                                                                            |
| <u>Prompt</u>                                                                                                                          | Are public contributors offered an individual annual review?                                                      | <input type="checkbox"/> Yes<br><input type="checkbox"/> No                                                                |
|                                                                                                                                        | Are public contributors offered the chance to contribute to a report identifying progress within the PPI work?    | <input type="checkbox"/> Yes<br><input type="checkbox"/> No                                                                |
|                                                                                                                                        | Is there a document that sets the mutual expectations of the role and responsibilities?                           | <input type="checkbox"/> Yes<br><input type="checkbox"/> No                                                                |
|                                                                                                                                        | Are researchers asked about public involvement in progress meetings or annual review?                             | <input type="checkbox"/> Yes<br><input type="checkbox"/> No                                                                |
| Indicator 2.4                                                                                                                          | We recognise individual ideas and contributions and uphold decisions together                                     |                                                                                                                            |
| <u>Prompt</u>                                                                                                                          | Are suggestions implemented as a result of public involvement inputs?<br>Are actions recorded?                    | <input type="checkbox"/> Yes<br><input type="checkbox"/> No<br><input type="checkbox"/> Yes<br><input type="checkbox"/> No |

| <b>Standard 3: Support and Learning</b>                                                                         |                                                                                                                                        |                                                                                         |
|-----------------------------------------------------------------------------------------------------------------|----------------------------------------------------------------------------------------------------------------------------------------|-----------------------------------------------------------------------------------------|
| We offer and promote support and learning which builds confidence and skills for public involvement in research |                                                                                                                                        |                                                                                         |
| <b>Indicator 3.1</b>                                                                                            | We designate and monitor resources to ensure and support effective public involvement                                                  |                                                                                         |
| <u>Prompt</u>                                                                                                   | Is there a system for financial support for public contributors?                                                                       | <input type="checkbox"/> Yes<br><input type="checkbox"/> No                             |
|                                                                                                                 | Is there dedicated public involvement support/resource for researchers? E.g. admin support/academic lead for public involvement.       | <input type="checkbox"/> Yes<br><input type="checkbox"/> No                             |
|                                                                                                                 | Are researchers given core time to undertake public involvement in their role?                                                         | <input type="checkbox"/> Yes<br><input type="checkbox"/> No<br><input type="checkbox"/> |
| <b>Indicator 3.2</b>                                                                                            | We offer a range of support to address identified needs                                                                                |                                                                                         |
| <u>Prompt</u>                                                                                                   | Is access provided to people with additional needs such as mobility issues, carer support, or learning difficulties?                   | <input type="checkbox"/> Yes<br><input type="checkbox"/> No                             |
|                                                                                                                 | Please give examples of support given.                                                                                                 |                                                                                         |
| <b>Indicator 3.3</b>                                                                                            | We have a clearly identified point of contact for information and support                                                              |                                                                                         |
| <u>Prompt</u>                                                                                                   | Is there a named lead for public involvement within research teams/staff groups?                                                       | <input type="checkbox"/> Yes<br><input type="checkbox"/> No                             |
|                                                                                                                 | Do public contributors have a named mentor?                                                                                            | <input type="checkbox"/> Yes<br><input type="checkbox"/> No                             |
| <b>Indicator 3.4</b>                                                                                            | We develop, deliver and monitor learning opportunities in partnership, for all involved in research                                    |                                                                                         |
| <u>Prompt</u>                                                                                                   | Is information about accessing training for public contributors provided? E.g. from local public involvement networks                  | <input type="checkbox"/> Yes<br><input type="checkbox"/> No                             |
|                                                                                                                 | Is ad hoc training, provided by researchers, available to public contributors?                                                         | <input type="checkbox"/> Yes<br><input type="checkbox"/> No                             |
|                                                                                                                 | Is public involvement training available to researchers?                                                                               | <input type="checkbox"/> Yes<br><input type="checkbox"/> No                             |
|                                                                                                                 | Have standard operating procedures on areas such as recruitment, training, supporting and financing public involvement been developed? | <input type="checkbox"/> Yes<br><input type="checkbox"/> No                             |
|                                                                                                                 | Are researchers trained and updated on standard operating procedures?                                                                  | <input type="checkbox"/> Yes<br><input type="checkbox"/> No                             |

|               |                                                                                        |                                                                                                                                                                                                                                                                                                                                                                                                        |
|---------------|----------------------------------------------------------------------------------------|--------------------------------------------------------------------------------------------------------------------------------------------------------------------------------------------------------------------------------------------------------------------------------------------------------------------------------------------------------------------------------------------------------|
| Indicator 3.5 | We actively learn from others, we build on what we have learned and share our learning |                                                                                                                                                                                                                                                                                                                                                                                                        |
| Prompt        | Do researchers:                                                                        | <input type="checkbox"/> Attend conferences/workshops?<br>If yes, how many in the last 12 months _____<br><input type="checkbox"/> Present at conferences/workshops?<br>If yes, how many in the last 12 months _____<br><input type="checkbox"/> Do they publish aspects of their work with public contributors?<br><input type="checkbox"/> Engage with other groups working with public involvement. |

|                                                                                                                    |                                                                                                               |                                                                                                                                                                                                                                                                             |
|--------------------------------------------------------------------------------------------------------------------|---------------------------------------------------------------------------------------------------------------|-----------------------------------------------------------------------------------------------------------------------------------------------------------------------------------------------------------------------------------------------------------------------------|
| <b>Standard 4: Communications</b>                                                                                  |                                                                                                               |                                                                                                                                                                                                                                                                             |
| We use plain language for timely, two way and targeted communications, as part of involvement plans and activities |                                                                                                               |                                                                                                                                                                                                                                                                             |
| Indicator 4.1                                                                                                      | We develop and deliver a communications plan for our involvement activities                                   |                                                                                                                                                                                                                                                                             |
| Prompt                                                                                                             | Are different media platforms used to communicate about public involvement plans and activities?              | <input type="checkbox"/> Annual report<br><input type="checkbox"/> Newsletter<br><input type="checkbox"/> Website presence<br><input type="checkbox"/> Blog<br><input type="checkbox"/> Twitter<br><input type="checkbox"/> Word of mouth<br><input type="checkbox"/> Other |
| Indicator 4.2                                                                                                      | We are inclusive and flexible in our communication methods to meet the need of different people               |                                                                                                                                                                                                                                                                             |
| Prompt                                                                                                             | Is information available in different formats such as easy to read format or translated upon request (Wales)? | <input type="checkbox"/> Yes<br><input type="checkbox"/> No                                                                                                                                                                                                                 |
| Indicator 4.3                                                                                                      | We gather, offer and act on feedback, which we then share                                                     |                                                                                                                                                                                                                                                                             |
| Prompt                                                                                                             | Is feedback invited from public contributors?                                                                 | <input type="checkbox"/> Yes<br><input type="checkbox"/> No                                                                                                                                                                                                                 |
|                                                                                                                    | Is feedback shared and acted upon?                                                                            | <input type="checkbox"/> Yes<br><input type="checkbox"/> No<br><br>If yes, how?                                                                                                                                                                                             |

| <b>Standard 5: Impact</b>                                                                           |                                                                                                          |                                                                                                       |
|-----------------------------------------------------------------------------------------------------|----------------------------------------------------------------------------------------------------------|-------------------------------------------------------------------------------------------------------|
| To drive improvement, we capture and share the difference that public involvement makes to research |                                                                                                          |                                                                                                       |
| Indicator 5.1                                                                                       | We involve the public in the assessment of public involvement in research                                |                                                                                                       |
| Prompt                                                                                              | Are public contributors involved in reporting, auditing, impact recording, or review processes?          | <input type="checkbox"/> Yes<br><input type="checkbox"/> No                                           |
|                                                                                                     | Are the outcomes of these assessments acted on?                                                          | <input type="checkbox"/> Yes<br><input type="checkbox"/> No<br><br>If yes, please provide an example: |
| Indicator 5.2                                                                                       | We record our agreed purpose for public involvement and its intended outcomes                            |                                                                                                       |
| Prompt                                                                                              | Is there an agreed policy detailing purposes of public involvement and intended outcomes?                | <input type="checkbox"/> Yes<br><input type="checkbox"/> No                                           |
|                                                                                                     | Are there set objectives per involvement activity?                                                       | <input type="checkbox"/> Yes<br><input type="checkbox"/> No                                           |
| Indicator 5.3                                                                                       | We collect information that will help us assess the impact of public involvement in research             |                                                                                                       |
| Prompt                                                                                              | Are public involvement activities collated and reported against objectives?                              | <input type="checkbox"/> Yes<br><input type="checkbox"/> No<br><br>If yes, how? e.g. online diaries   |
| Indicator 5.4                                                                                       | We reflect, learn and report the extent to which we have met our intended purpose and predicted outcomes |                                                                                                       |
| Prompt                                                                                              | Are public involvement specific outcomes reported?                                                       | <input type="checkbox"/> Yes<br><input type="checkbox"/> No<br><br>If yes, how are outcomes reported: |
|                                                                                                     | Is the impact of public involvement recorded?                                                            | <input type="checkbox"/> Yes<br><input type="checkbox"/> No<br><br>If yes, how is impact recorded:    |
|                                                                                                     | Are best practice case studies collected and reported?                                                   | <input type="checkbox"/> Yes<br><input type="checkbox"/> No                                           |
|                                                                                                     | Are valuable lessons from best practice examples acted upon?                                             | <input type="checkbox"/> Yes<br><input type="checkbox"/> No<br><br>If yes, how is impact recorded:    |

| <b>Standard 6: Governance</b>                                                                                    |                                                                                                             |                                                                                                                                                                                                                                                    |
|------------------------------------------------------------------------------------------------------------------|-------------------------------------------------------------------------------------------------------------|----------------------------------------------------------------------------------------------------------------------------------------------------------------------------------------------------------------------------------------------------|
| We involve the public in our governance and leadership so that our decisions promote and protect public interest |                                                                                                             |                                                                                                                                                                                                                                                    |
| Indicator 6.1                                                                                                    | Public voices are heard, valued and included in decision making                                             |                                                                                                                                                                                                                                                    |
| <u>Prompt</u>                                                                                                    | Are the public involved in setting research questions via:                                                  | <input type="checkbox"/> Priority setting exercises<br><input type="checkbox"/> Steering groups<br><input type="checkbox"/> Executive groups<br><input type="checkbox"/> Research management groups<br><input type="checkbox"/> Funding committees |
| Indicator 6.2                                                                                                    | We have public involvement strategies and/or plans in place that we regularly monitor, review and report on |                                                                                                                                                                                                                                                    |
| <u>Prompt</u>                                                                                                    | Are public involvement activities included in reports to funders?                                           | <input type="checkbox"/> Yes<br><input type="checkbox"/> No                                                                                                                                                                                        |
|                                                                                                                  | Is public involvement policy and objectives reviewed on an annual basis?                                    | <input type="checkbox"/> Yes<br><input type="checkbox"/> No                                                                                                                                                                                        |
| Indicator 6.3                                                                                                    | Responsibility for public involvement is visible and accountable through our management structure           |                                                                                                                                                                                                                                                    |
| <u>Prompt</u>                                                                                                    | Are public contributors invited to join management groups?                                                  | <input type="checkbox"/> Yes<br><input type="checkbox"/> No<br>If yes, at what level? e.g. executive/senior/project                                                                                                                                |
|                                                                                                                  | Are public contributors visible in organisational structures e.g. included on organograms?                  | <input type="checkbox"/> Yes<br><input type="checkbox"/> No                                                                                                                                                                                        |
| Indicator 6.4                                                                                                    | We allocate money and other resources for public involvement                                                |                                                                                                                                                                                                                                                    |
| <u>Prompt</u>                                                                                                    | Is there specific funding for public involvement?                                                           | <input type="checkbox"/> Yes<br><input type="checkbox"/> No                                                                                                                                                                                        |
|                                                                                                                  | From where does public involvement funding originate?                                                       |                                                                                                                                                                                                                                                    |
|                                                                                                                  | Does the public involvement budget include costs for:                                                       | <input type="checkbox"/> Staff<br><input type="checkbox"/> Volunteers<br><input type="checkbox"/> Involvement activities<br><input type="checkbox"/> Senior leadership                                                                             |
|                                                                                                                  | Is there communications support available for public involvement?                                           | <input type="checkbox"/> Yes<br><input type="checkbox"/> No                                                                                                                                                                                        |
